# Supplementary material for: Influences of Adult Gender and Parenthood on Adult-Child Interaction Style
Source: MDPI journal article supplement (doi:10.3390/children9121804), 2022-11-24
Supplement: s1 [file s1]

## Experiences, Perceptions, and Interests Questionnaire (EPIQ)

(Version 1.5)

---

This questionnaire will ask you about your experiences and perceptions regarding caregiving. Please answer all questions to the best of your knowledge but do not "overthink" your answers. Your first intuition is usually the best answer.

This questionnaire should take you less than 15 minutes to complete. If you have any questions, please ask us at any time or email us at [OnlineBabyLab@pitt.edu](mailto:OnlineBabyLab@pitt.edu).

Thank you for your help in our research.

What is your gender?

- ☐ Female
- ☐ Male
- ☐ Other

How many YOUNGER siblings do you have?

- ☐ None (0)
- ☐ One (1)
- ☐ Two (2)
- ☐ Three or more (3+)

How many OLDER siblings do you have?

- ☐ None (0)
- ☐ One (1)
- ☐ Two (2)
- ☐ Three or more (3+)

Have you ever worked as a babysitter (including for your own siblings)

☐ Yes

☐ No

Have you ever worked as a teacher or teacher's aide?

☐ Yes

☐ No

Have you ever volunteered or worked in a preschool or other childcare business?

☐ Yes

☐ No

On a scale from 0 = no experience to 10 = extensive experience, please rate your own personal experience in interacting with:

|                                        |                       |                       |                       |                       |                       |                       |                       |                       |                       |                       |
|----------------------------------------|-----------------------|-----------------------|-----------------------|-----------------------|-----------------------|-----------------------|-----------------------|-----------------------|-----------------------|-----------------------|
| Babies (ages 0-2 years)                | <input type="radio"/> |
| Preschool children (ages 2-4 years)    | <input type="radio"/> |
| Kindergarten children (ages 4-5 years) | <input type="radio"/> |
| Elementary school children             | <input type="radio"/> |
| Middle school children                 | <input type="radio"/> |
| High-school children                   | <input type="radio"/> |

Please rate how much you agree with the following statements about yourself:

|                                | Strongly agree        | Somewhat agree        | Neither agree nor disagree | Somewhat disagree     | Strongly disagree     |
|--------------------------------|-----------------------|-----------------------|----------------------------|-----------------------|-----------------------|
| I have a strong feminine side  | <input type="radio"/> | <input type="radio"/> | <input type="radio"/>      | <input type="radio"/> | <input type="radio"/> |
| I have a strong masculine side | <input type="radio"/> | <input type="radio"/> | <input type="radio"/>      | <input type="radio"/> | <input type="radio"/> |
| My closest friends are female  | <input type="radio"/> | <input type="radio"/> | <input type="radio"/>      | <input type="radio"/> | <input type="radio"/> |
| Most of my friends are males   | <input type="radio"/> | <input type="radio"/> | <input type="radio"/>      | <input type="radio"/> | <input type="radio"/> |

How much do you agree with the following statements?

|                                                                                                                  | Strongly agree        | Somewhat agree        | Neither agree nor disagree | Somewhat disagree     | Strongly disagree     |
|------------------------------------------------------------------------------------------------------------------|-----------------------|-----------------------|----------------------------|-----------------------|-----------------------|
| 1. People can be both aggressive and nurturing regardless of sex                                                 | <input type="radio"/> | <input type="radio"/> | <input type="radio"/>      | <input type="radio"/> | <input type="radio"/> |
| 2. People should be treated the same regardless of their sex                                                     | <input type="radio"/> | <input type="radio"/> | <input type="radio"/>      | <input type="radio"/> | <input type="radio"/> |
| 3. The freedom that children are given should be determined by their age and maturity level and not by their sex | <input type="radio"/> | <input type="radio"/> | <input type="radio"/>      | <input type="radio"/> | <input type="radio"/> |
| 4. Tasks around the house should be shared equally by men and women                                              | <input type="radio"/> | <input type="radio"/> | <input type="radio"/>      | <input type="radio"/> | <input type="radio"/> |
| 5. We should stop thinking about whether people are male or female and focus on other characteristics            | <input type="radio"/> | <input type="radio"/> | <input type="radio"/>      | <input type="radio"/> | <input type="radio"/> |
| 6. A father's major responsibility is to provide financially for his children                                    | <input type="radio"/> | <input type="radio"/> | <input type="radio"/>      | <input type="radio"/> | <input type="radio"/> |

|                                                                         |                       |                       |                       |                       |                       |
|-------------------------------------------------------------------------|-----------------------|-----------------------|-----------------------|-----------------------|-----------------------|
| 7. Men are more sexual than women                                       | <input type="radio"/> |
| 8. Some types of work are just not appropriate for women                | <input type="radio"/> |
| 9. Mothers should make most decisions about how children are brought up | <input type="radio"/> |
| 10. Mothers should work only if necessary                               | <input type="radio"/> |

How much do you agree with the following statements?

|                                                                                                                                   | Strongly agree        | Somewhat agree        | Neither agree nor disagree | Somewhat disagree     | Strongly disagree     |
|-----------------------------------------------------------------------------------------------------------------------------------|-----------------------|-----------------------|----------------------------|-----------------------|-----------------------|
| 11. Girls should be protected and watched over more than boys                                                                     | <input type="radio"/> | <input type="radio"/> | <input type="radio"/>      | <input type="radio"/> | <input type="radio"/> |
| 12. Women rather than men should take maternity leave after giving birth                                                          | <input type="radio"/> | <input type="radio"/> | <input type="radio"/>      | <input type="radio"/> | <input type="radio"/> |
| 13. For many important jobs, it is better to choose men instead of women.                                                         | <input type="radio"/> | <input type="radio"/> | <input type="radio"/>      | <input type="radio"/> | <input type="radio"/> |
| 14. Men are just as effective as women at staying home and taking care of children                                                | <input type="radio"/> | <input type="radio"/> | <input type="radio"/>      | <input type="radio"/> | <input type="radio"/> |
| 15. When raising children, girls should be taught to be emotional and caring and boys should be taught to be strong and resilient | <input type="radio"/> | <input type="radio"/> | <input type="radio"/>      | <input type="radio"/> | <input type="radio"/> |

|                                                                                   |                       |                       |                       |                       |                       |
|-----------------------------------------------------------------------------------|-----------------------|-----------------------|-----------------------|-----------------------|-----------------------|
| 16. Because of their biology, mothers are more nurturing than fathers             | <input type="radio"/> |
| 17. Being a stay-at-home parent is more fulfilling for women than for men         | <input type="radio"/> |
| 18. In times of economic crisis, men should have priority over women to get a job | <input type="radio"/> |
| 19. Female teachers are more effective than male teachers                         | <input type="radio"/> |
| 20. Children show equal levels of attachment to their mothers and their fathers   | <input type="radio"/> |

How interested are you in the following activities (0 = less interested, 100 = more interested)

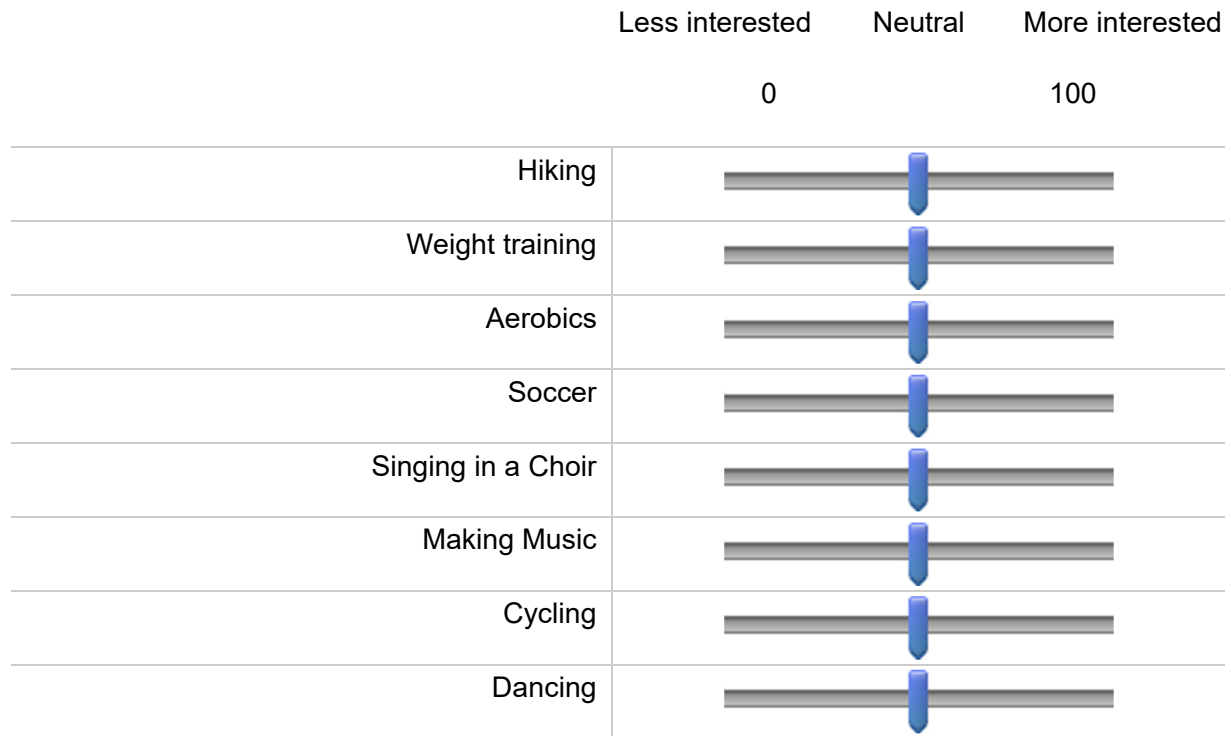

What race do identify with? (Check all that apply)

- ☐ White
- ☐ Black or African American
- ☐ American Indian or Alaska Native
- ☐ Asian
- ☐ Native Hawaiian or Pacific Islander
- ☐ Other



Are you Hispanic or Latino?

☐ Yes

☐ No

---
